# Supplementary material for: Molecular gene signature and prognosis of non-small cell lung cancer
Source: PubMed Central journal article supplement (PMC5239522; doi:10.18632/oncotarget.10622), 2016-07-16
Supplement: oncotarget-07-51898-s001.pdf [file oncotarget-07-51898-s001.pdf]

## Molecular gene signature and prognosis of non-small cell lung cancer

### Supplementary Materials

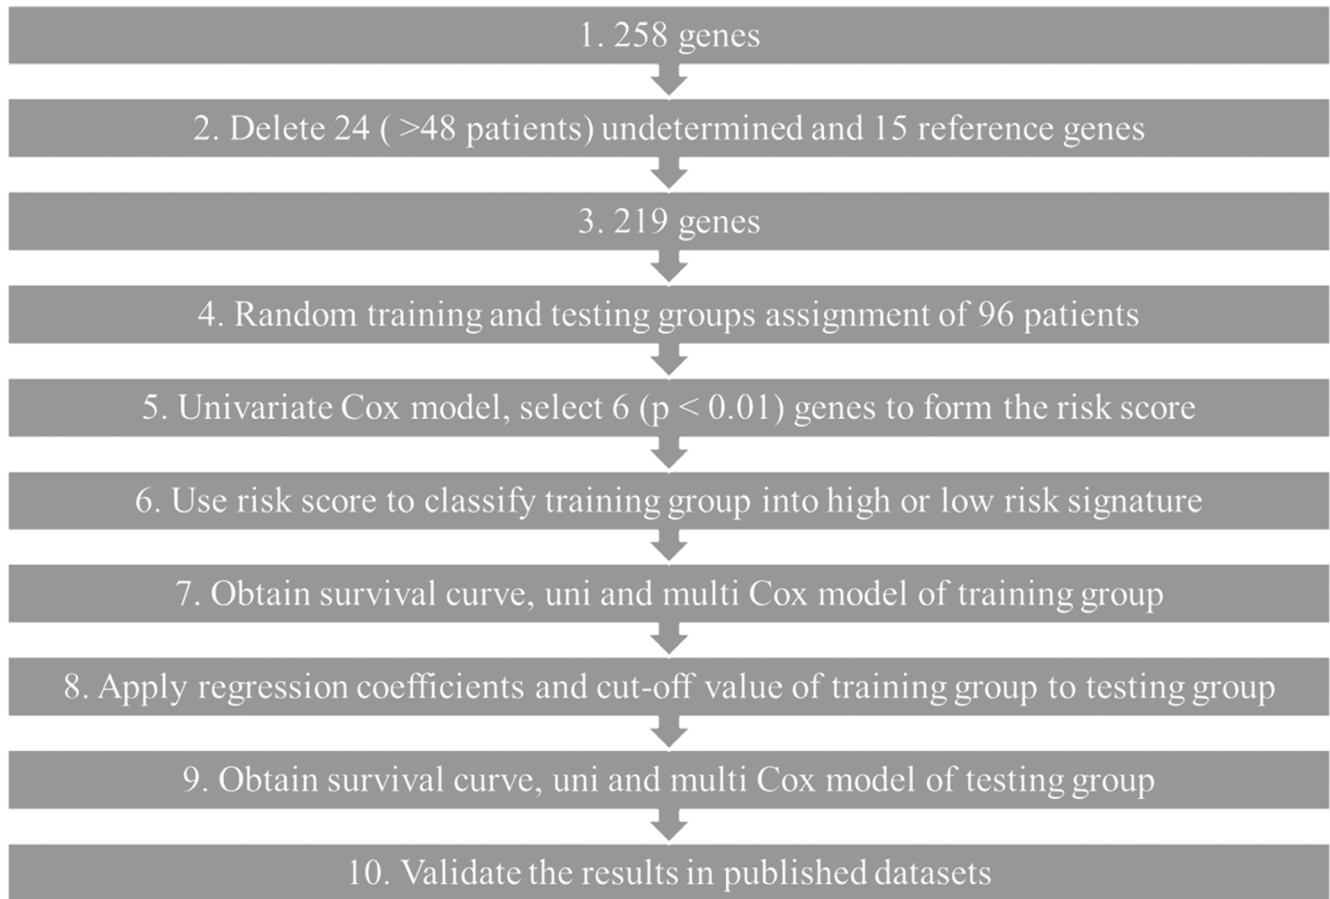

**Supplementary Figure S1: The overall analytic process of candidate gene selection, risk score algorithm, survival analysis and validation.**

**Supplementary Table S1: Basic characteristics of the validation cohort (merged public datasets)**

|                         | ALL ( <i>n</i> = 1160) |         | Low signature group<br>( <i>n</i> = 580) |         | High signature group<br>( <i>n</i> = 580) |         | <i>p</i> -value |
|-------------------------|------------------------|---------|------------------------------------------|---------|-------------------------------------------|---------|-----------------|
| Gender (* = 111)        |                        |         |                                          |         |                                           |         | <.0001          |
| Female                  | 389                    | (37.08) | 228                                      | (44.02) | 161                                       | (30.32) |                 |
| Male                    | 660                    | (62.92) | 290                                      | (55.98) | 370                                       | (69.68) |                 |
| Stage (*= 193)          |                        |         |                                          |         |                                           |         | <.0001          |
| 1                       | 612                    | (63.29) | 367                                      | (72.39) | 245                                       | (53.26) |                 |
| 2                       | 209                    | (21.61) | 96                                       | (18.93) | 113                                       | (24.57) |                 |
| 3                       | 131                    | (13.55) | 42                                       | (8.28)  | 89                                        | (19.35) |                 |
| 4                       | 15                     | (1.55)  | 2                                        | (0.39)  | 13                                        | (2.83)  |                 |
| Smoking (*= 703)        |                        |         |                                          |         |                                           |         | 0.0008          |
| No                      | 145                    | (31.73) | 95                                       | (37.70) | 50                                        | (24.39) |                 |
| Yes                     | 312                    | (68.27) | 157                                      | (62.30) | 155                                       | (75.61) |                 |
| EGFR mutation (* = 918) |                        |         |                                          |         |                                           |         | 0.0001          |
| No                      | 107                    | (44.21) | 48                                       | (34.29) | 59                                        | (57.84) |                 |
| Yes                     | 135                    | (55.79) | 92                                       | (65.71) | 43                                        | (42.16) |                 |
| Histology (* = 0)       |                        |         |                                          |         |                                           |         | <.0001          |
| Adenocarcinoma          | 690                    | (59.48) | 420                                      | (72.41) | 270                                       | (46.55) |                 |
| SCC                     | 293                    | (25.26) | 99                                       | (17.07) | 194                                       | (33.45) |                 |
| Large cell carcinoma    | 110                    | (9.48)  | 28                                       | (4.83)  | 82                                        | (14.14) |                 |
| others                  | 67                     | (5.78)  | 33                                       | (5.69)  | 34                                        | (5.86)  |                 |
| Age (* = 210)           |                        |         |                                          |         |                                           |         | 0.1762          |
| Mean, sd                | 63.02 ± 10.13          |         | 62.60 ± 11.09                            |         | 63.48 ± 8.97                              |         |                 |

Data are presented as mean ± standard deviation or *n* (%); *p* value by  $\chi^2$  or two-tailed *t* test. \* = missing data.

**Supplementary Table S2: Genes correlated with patients' survival.** See Supplementary\_Table\_S2**Supplementary Table S3: Probesets of acquired 6-Gene signature**

| Gene Name | Probeset ID                                     |
|-----------|-------------------------------------------------|
| ABCC4     | 1554918_a_at;1555039_a_at;203196_at;243928_s_at |
| ADRBK2    | 204183_s_at;204184_s_at;228771_at               |
| KLHL23    | 213610_s_at;217505_at;241682_at                 |
| PDS5A     | 212138_at;212140_at;213983_s_at;213984_at       |
| UHRF1     | 225655_at                                       |
| ZNF551    | 242992_at;243194_at;243195_s_at;211721_s_at     |
